# Supplementary material for: Deacylated Derivative of Hericenone C Treated by Lipase Shows Enhanced Neuroprotective Properties Compared to Its Parent Compound
Source: MDPI journal article supplement (doi:10.3390/molecules28114549), 2023-06-05
Supplement: s1 [file s1]

## Supplementary data

# Deacylated Derivative of Hericenone C Treated by Lipase Shows Enhanced Neuroprotective Properties Compared to Its Parent Compound

Sonam Tamrakar <sup>1,2,†</sup>, Dongmei Wang <sup>1,†</sup>, Eri Hiraki <sup>1,†</sup>, Chunguang Han <sup>1</sup>, Yang Ruan <sup>1</sup>, Ahmed E. Allam <sup>1,3</sup>, Yhiya Amen <sup>4</sup>, Yoshinori Katakura <sup>5</sup> and Kuniyoshi Shimizu <sup>1,\*</sup>

<sup>1</sup> Department of Agro-Environmental Sciences, Faculty of Agriculture, Kyushu University, Fukuoka 819-0395, Japan; tamraka3@msu.edu (S.T.); spswdm@hotmail.com (D.W.); e.hiraki.835@gmail.com (E.H.); syunkouk@gmail.com (C.H.); ahxcry9619@hotmail.com (Y.R.); ahmedezzaldeanallam@gmail.com (A.E.A.)

<sup>2</sup> Department of Fisheries and Wildlife, College of Agriculture and Natural Resources, Michigan State University, East Lansing, MI 48824, USA

<sup>3</sup> Department of Pharmacognosy, Faculty of Pharmacy, Al-Azhar University, Assiut 71524, Egypt

<sup>4</sup> Department of Pharmacognosy, Faculty of Pharmacy, Mansoura University, Mansoura 35516, Egypt; yhiyaamen@gmail.com

<sup>5</sup> Department of Genetic Resources Technology, Faculty of Agriculture, Kyushu University, Fukuoka 819-0395, Japan; katakura@grt.kyushu-u.ac.jp

\* Correspondence: shimizu@agr.kyushu-u.ac.jp

† These authors contributed equally to this work.

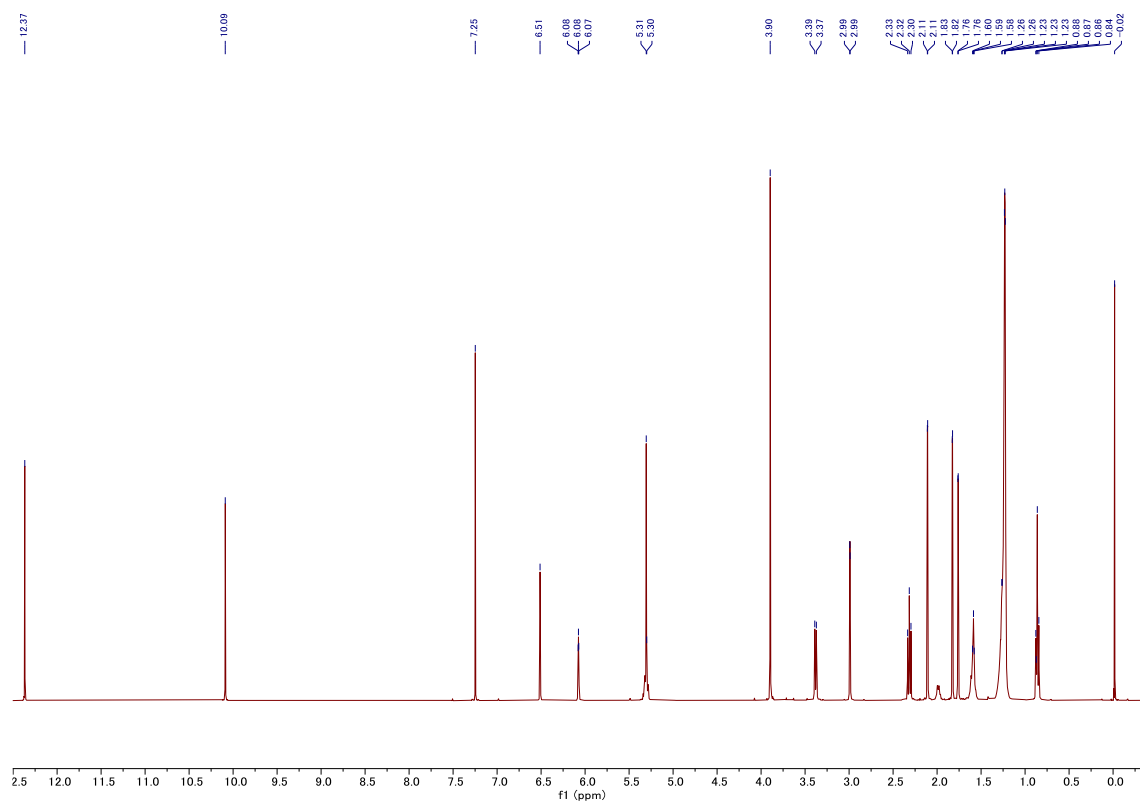

**Figure S1.**  $^1\text{H}$ -NMR spectrum of compound **1** ( $\text{CDCl}_3$ , 400 MHz)



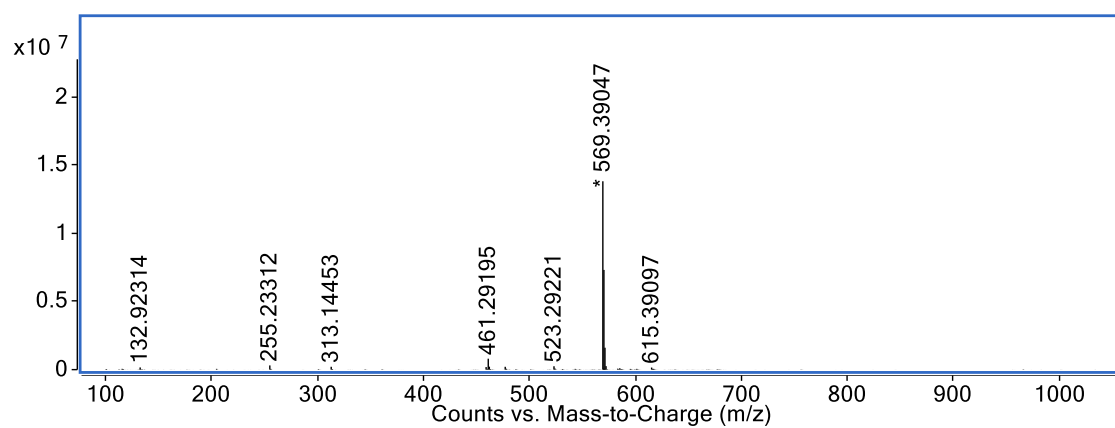

**Figure S4.** HR-ESI-MS Analysis of compound **1**

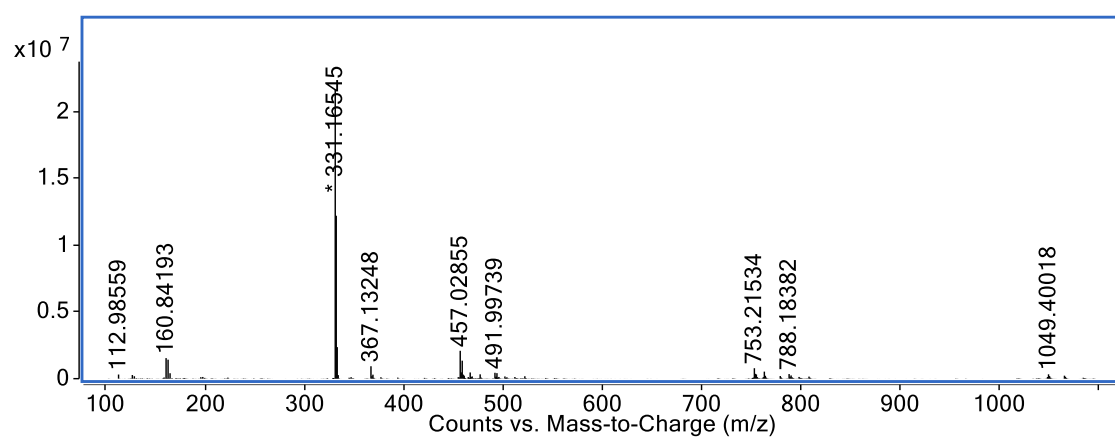

**Figure S5.** HR-ESI-MS Analysis of compound **2**
